## LSR Targets YAP to Modulate Intestinal Paneth Cell Differentiation

Yanan An<sup>#1</sup>, Chao Wang<sup>#1</sup>, Baozhen Fan<sup>#2</sup>, Ying Li<sup>1</sup>, Feng Kong<sup>3,4,5</sup>, Chengjun Zhou<sup>6</sup>, Zhang Cao<sup>7</sup>,  
Jieying Liu<sup>1</sup>, Mingxia Wang<sup>1</sup>, Hui Sun<sup>1</sup>, Shengtian Zhao<sup>\*2,3,4</sup>, Yongfeng Gong<sup>\*1</sup>

Author affiliation:

1 Department of Physiology, Binzhou Medical University, Yantai, Shandong, CHINA

2 Department of Urology, Binzhou Medical University Hospital, Binzhou, Shandong, CHINA

3 Shandong Provincial Engineering Laboratory of Urologic Tissue Reconstruction, Jinan, Shandong, CHINA

4 Department of Urology, Shandong Provincial Hospital Affiliated to Shandong First Medical University, Jinan, Shandong, CHINA

5 Department of Central Laboratory, Shandong Provincial Hospital Affiliated to Shandong First Medical University, Jinan, Shandong, CHINA

6 Department of Pathology, The Second Hospital, Cheeloo College of Medicine, Shandong University, Jinan, Shandong, CHINA

7 Department of Pathology, Binzhou Medical University Hospital, Binzhou, Shandong, CHINA

# These three authors contributed equally to this work

\* Corresponding authors:

Yongfeng Gong, MD, PhD, Professor

Department of Physiology

Binzhou Medical University

346 Guanhai Avenue

Yantai, Shandong, CHINA 264003

Phone: +86-535-6913163, +86-18705439006

E-mail: ygong@bzmc.edu.cn

Shengtian Zhao, MD, PhD, Professor

Department of Urology

Binzhou Medical University Hospital

661 Huanghe 2nd Road

Binzhou, Shandong, CHINA 256603

Phone: +86-543-3256802, +86-15153169567

E-mail: zhaoshengtian@sdu.edu.cn

## 38 SUMMARY

39 Lipolysis-stimulated lipoprotein receptor (LSR) is a multi-functional protein that is best known for its  
40 roles in assembly of epithelial tricellular tight junctions and hepatic clearance of lipoproteins. Here, we  
41 investigated whether LSR contributes to intestinal epithelium homeostasis and pathogenesis of intestinal  
42 disease. By using multiple conditional deletion mouse models and *ex vivo* cultured organoids, we find  
43 that LSR elimination in intestinal stem cells results in disappearance of Paneth cell without affecting the  
44 differentiation of other cell lineages. Mechanistic studies reveal that LSR deficiency increases abundance  
45 and nuclear localization of YAP by modulating its phosphorylation and proteasomal degradation. Using  
46 gain- and loss-of-function studies we show that LSR protects against necrotizing enterocolitis through  
47 enhancement of Paneth cell differentiation in small intestinal epithelium. Thus, this study identifies LSR  
48 as an upstream negative regulator of YAP activity, an essential factor for Paneth cell differentiation, and  
49 a potential novel therapeutic target for inflammatory bowel disease.

50 **Keywords:** LSR, Intestinal Stem Cell, YAP, Paneth Cell

## 51 Introduction

52 Lipolysis-stimulated lipoprotein receptor (LSR), a multi-functional type I transmembrane protein  
53 containing an immunoglobulin-like domain (Masuda et al., 2011), has been linked to a variety of  
54 biological processes, molecular functions and cellular compartments. In the liver, LSR recognizes  
55 apolipoprotein B/E-containing lipoproteins in the presence of free fatty acids, and is thought to be  
56 involved in the hepatic clearance of triglyceride-rich lipoproteins (Narvekar et al., 2009; Yen et al., 1999).  
57 LSR also plays an essential role in organization of tricellular tight junctions that are involved in epithelial  
58 barrier function (Masuda et al., 2011; Sugawara et al., 2021). In the brain, LSR is specifically expressed  
59 at tricellular tight junctions between central nervous system endothelial cells and plays critical roles for  
60 proper blood–brain barrier formation and function (Sohet et al., 2015). LSR is also a target molecule for  
61 cell binding and internalization of *Clostridium difficile* transferase (Hemmasi et al., 2015; Papatheodorou

62 et al., 2011). Although its role as either a tumor promoter or suppressor (or both) is not established,  
63 expression and localization of LSR have been found to be altered in several cancers (Dong et al., 2022;  
64 Shimada et al., 2017; Takahashi et al., 2021). The dominant subcellular localization of LSR is on the  
65 membrane, however, its localization in the nucleus of human epithelial cells has been reported (Reaves  
66 et al., 2017). Taken together, these findings suggest that the subcellular localization, function, and  
67 signaling pathways regulated by LSR are tissue- and cell type-specific. However, the specific cell types  
68 that express LSR have been difficult to identify, and the functions of LSR in postnatal development and  
69 tissue homeostasis have been hampered by the perinatal lethality of *Lsr* null mice (Mesli et al., 2004;  
70 Sohet et al., 2015).

71 Previous studies have revealed that LSR is highly expressed in the intestinal epithelium and localized at  
72 the basolateral membrane in addition to tricellular tight junctions of mouse intestine (Sugawara et al.,  
73 2021). However, roles of LSR in intestinal homeostasis remain to be fully elucidated. Earlier work in  
74 *Drosophila* has established a pivotal link between tricellular tight junction proteins, stem cell behaviour,  
75 and intestinal homeostasis (Resnik-Docampo et al., 2017), to what extent this connection is conserved in  
76 mammalian systems remains uncertain. Meanwhile, embryonic lethality in LSR-deficient mice  
77 highlights the importance of LSR for development (Mesli et al., 2004), but the significance and relevance  
78 of this protein in regulating intestinal development and differentiation in mammals are largely unclear.  
79 Here, we used a combination of *in vivo* conditional deletion mouse models and *ex vivo* cultured organoids  
80 to investigate the role of LSR in differentiation and function of intestinal epithelium.

## 81 MATERIAL AND METHODS

82 The antibodies and primer sequences used for qRT-PCR used in this study are summarized in *SI Appendix*,  
83 Supplementary Table 1 and Supplementary Table 2, respectively. All mice were bred and maintained  
84 according to the Binzhou Medical University animal research requirements, and all procedures were  
85 approved by the Institutional Animal Research and Care committee. *SI Appendix, Materials and Methods*  
86 includes additional topics on generation of *Lsr* floxed animals, organoid culture, whole-transcriptome  
87 RNA sequencing, immunoprecipitation-mass spectrometry, co-immunoprecipitation, lentivirus-  
88 mediated knockdown, immunolabeling and confocal microscopy, statistical analyses, and so forth.

## 89 Results

### 90 LSR ablation results in increased numbers of proliferating cells and loss of Paneth cell lineage in 91 the small intestine

92 To bypass the embryonic lethality of constitutive deletion and investigate the potential role of *Lsr* in  
93 intestinal homeostasis, we generated *Lsr<sup>loxP/loxP</sup>* mice, in which the mutant *Lsr* allele contains exons 1~2  
94 flanked by loxP sites, on a C57BL/6J background (Figure S1A). We used *Lsr<sup>loxP/loxP</sup>; CAG-CreER* mice  
95 to achieve global *Lsr* deletion (*Lsr<sup>-/-</sup>*) upon tamoxifen treatment. We also generated intestinal-epithelium-  
96 specific *Lsr*-deficient mice (*Lsr<sup>vill KO</sup>*) by intercrossing villin-Cre and *Lsr<sup>loxP/loxP</sup>* mice (Figure S1B). qRT-  
97 PCR and western blot analysis showed that the transcription and expression of LSR in the intestines of  
98 *Lsr<sup>vill KO</sup>* and *Lsr<sup>-/-</sup>* mice were successfully blocked (Figure 1A-D). LSR was expressed throughout the  
99 cellular membrane of epithelium in confocal sections, and did not show remarkable concentration at  
100 tricellular tight junctions in the *Lsr<sup>ctrl</sup>* mouse intestine (Figure 1E). This was further ascertained by the  
101 disappearance of LSR signal in intestinal epithelium of *Lsr<sup>vill KO</sup>* and *Lsr<sup>-/-</sup>* mice (Figure 1E and F). In  
102 addition, transmission electron microscopy (TEM) showed that the structure of tight junctions between  
103 intestine epithelial cells (IECs) in *Lsr<sup>vill KO</sup>* mice was not significantly different from that in *Lsr<sup>ctrl</sup>* mice  
104 (Figure S1C). Further immunostaining of ZO-1 and CLDN1, as an indicator of bicellular tight junctions'  
105 integrity, showed no difference between *Lsr<sup>vill KO</sup>* and *Lsr<sup>ctrl</sup>* small intestine (Figure S1D and E). The  
106 tricellular tight junctions' integrity, assessed by tricellulin localization which was detected as dots at  
107 tricellular tight junctions, remained intact in *Lsr<sup>vill KO</sup>* small intestine (Figure S1F). Together, these results  
108 indicate that the gross barrier function of tight junctions is not affected by deletion of LSR in IECs.

109 LSR deficiency had no effect on the overall structures of small intestine or colon (Figure 1G and H).  
110 Surprisingly, the small intestines of *Lsr<sup>vill KO</sup>* mice were significantly thicker than those of *Lsr<sup>ctrl</sup>* mice,  
111 and this phenomenon was consistent at various times during the growth of mice (Figure 1G, I and J).  
112 Moreover, we observed significantly longer villi in H&E-stained sections of small intestine of *Lsr<sup>vill KO</sup>*  
113 and *Lsr<sup>-/-</sup>* mice (Figure 1K and L). And expression of proliferation-related proteins Ki67 and proliferating  
114 cell nuclear antigen (PCNA) in the small intestine was found to be significantly increased in *Lsr<sup>vill KO</sup>*  
115 mice (Figure 2A-D). Absence of LSR did not change the expression of OLFM4, a marker expressed by

116 the  $Lgr5^+$  ISCs, in small intestine (Figure 2E and F; Figure S1G), indicating that the highly proliferating  
117 cells in  $Lsr^{vill\ KO}$  and  $Lsr^{-/-}$  mice were not ISCs. Since an increased percentage of Ki67 positive cells was  
118 predominantly found in the transit-amplifying zone (Figure 2A), we speculated that the proliferating cells  
119 may be undifferentiated progenitor cells. In summary, these data demonstrate that in the absence of LSR,  
120 ISCs do not contribute to the population of proliferating cells, presumably representing the transit-  
121 amplifying population leading to increased villus length.

122 In agreement with histological observations, which indicated the absence of granule-containing cells in  
123 H&E-stained sections of small intestine of  $Lsr^{vill\ KO}$  and  $Lsr^{-/-}$  mice (Figure 1K and L), RNA sequencing  
124 (RNA-seq) analysis of small intestinal lysate from  $Lsr^{vill\ KO}$  and  $Lsr^{ctrl}$  showed that *Lsr*-knockout  
125 downregulated many genes comprising the Paneth cell signature (*Lyz1*, *Itn1*, *Mptx2*, *Defa5*, and *Cd24*)  
126 (Figure 2G and H) and DEFA family members (Figure S1H). Data were validated by  
127 immunofluorescence (Figure 2I and K) and qRT-PCR (Figure 2J and Figure S1I) performed on the small  
128 intestine from  $Lsr^{vill\ KO}$ ,  $Lsr^{-/-}$  and control littermate mice. These results demonstrated that LSR  
129 elimination in intestinal epithelium leads to depletion of Paneth cells. Despite the absence of Paneth cells,  
130 expression levels of markers for other types of cells (EpCAM for IECs, MUC2 and SPDEF for goblet  
131 cells, CHGA and NEUROG3 for enteroendocrine cells, CDX1 and CDX2 for columnar absorptive cells,  
132 and LGR5 for stem cells) and Periodic acid-Schiff (PAS) staining of the goblet cells were not  
133 significantly changed (Figure 2L and Figure S1J-M). These data collectively suggest that LSR is  
134 absolutely required to maintain the Paneth cell lineage.

### 135 **LSR is required for $Lgr5^+$ ISCs to Paneth cell differentiation**

136 Paneth cells can be derived from  $Lgr5^+$  ISCs, we conjectured that LSR might affect the function of  $Lgr5^+$   
137 ISCs to differentiate into Paneth cells. Interestingly, we found that LSR was highly expressed in  $Lgr5^+$   
138 ISCs at the bottom of intestinal crypts (Figure 3A). We used a *Lgr5-CreERT2* strain to selectively delete  
139 *Lsr* in  $Lgr5^+$  ISCs in a tamoxifen-inducible manner (hereafter referred to as  $Lsr^{ISC\ KO}$ ) and to specifically  
140 explore the cellular and molecular consequences of *Lsr* deletion in  $Lgr5^+$  ISCs (Figure 3B and C). We  
141 found reduced expression of Paneth cell markers in the small intestine of  $Lsr^{ISC\ KO}$  mice 15 days after  
142 tamoxifen injection, again supporting the idea that LSR is required for  $Lgr5^+$  ISCs to Paneth cell

143 differentiation (Figure 3D and E). In line with the findings in  $Lsr^{vill\ KO}$  mice,  $Lsr^{ISC\ KO}$  intestine possessed  
144 other intestinal cell types (Figure S2A and B). In  $Lsr^{ISC\ KO}$  mice, intestinal permeability assay showed  
145 that the concentration of FITC-Dextran 4000 in plasma seemed to increase compared to that of the  $Lsr^{ctrl}$   
146 mice, but it did not attain a significant difference (Figure S2C), indicating the phenotype caused by LSR  
147 deficiency is not attributable to the dysfunction of permeability barrier. In contrast to  $Lsr^{vill\ KO}$  mice, we  
148 found no difference in the proliferative cells in small intestine of  $Lsr^{ISC\ KO}$  mice, indicating a potential  
149 direct role of LSR on transit-amplifying population. These results further demonstrated that in the  
150 absence of LSR in  $Lgr5^+$  ISCs, Paneth cells were not formed, but the differentiation of other IEC types  
151 was unaffected.

152 We also took advantage of crypt organoid culture to confirm the findings. Immunofluorescence analysis  
153 showed that LSR was expressed in organoid culture of  $Lsr^{ctrl}$  crypts and localized to the cell membrane,  
154 while no LSR expression was observed in  $Lsr^{vill\ KO}$  crypt organoids (Figure 3F). As expected, most crypts  
155 in  $Lsr^{ctrl}$  mice differentiated and budded into organoids with villi over time (Figure 3G). However, when  
156 intestinal crypts from  $Lsr^{vill\ KO}$  mice were cultured, *Lsr* deletion resulted in the formation of symmetrical  
157 spherical organoids (Figure 3F and G). In addition, on day 6, the shape of the spherical organoids did not  
158 change significantly; and the number of organoids gradually decreased (Figure 3G-I).  
159 Immunofluorescence staining showed that the distribution and quantity of stem cells (OFLM4) and  
160 epithelial cells (EpCAM) in  $Lsr^{vill\ KO}$  organoids were similar to those in  $Lsr^{ctrl}$  organoids (Figure 3J and  
161 K). Interestingly, similar to *in vivo* results, the Paneth cell markers (LYZ1 and MPTX2) exhibited  
162 significantly reduced and even complete loss of expression in  $Lsr^{vill\ KO}$  organoids (Figure 3L and M).  
163 Therefore, our results indicated that the Paneth cell number was positively correlated with the LSR  
164 expression level in both the crypt organoids and the intestine. Although the levels of the Paneth cell  
165 markers were significantly reduced in  $Lsr^{vill\ KO}$  organoids (Figure S2D), the numbers of other types of  
166 cells did not differ significantly between the  $Lsr^{vill\ KO}$  and  $Lsr^{ctrl}$  organoids (Figure 3N-P; Figure S2E).  
167 Therefore, the organoid culture of *Lsr* deficient crypts truthfully recapitulated the phenotype of  $Lsr^{vill\ KO}$   
168 mice intestine. Next, we knocked down *LSR* in human iPSCs (Figure 3Q) and then cultured organoids.  
169 Unsurprisingly, we obtained results similar to those described above (Figure 3R-V), indicating a  
170 conserved function of LSR in the intestine from mouse to human. Collectively, these findings support a  
171 critical role for LSR in regulating ISCs differentiation to Paneth cells.

## 172 **Loss of LSR results in upregulation and activation of YAP**

173 In intestine, excessive YAP can inhibit the differentiation of ISC into Paneth cells (Gregorieff et al.,  
174 2015), and promote the proliferation of undifferentiated progenitor cells (Camargo et al., 2007). Recent  
175 work by Serra *et al.* revealed that homogeneous activation or suppression of YAP abolished Paneth cell  
176 differentiation and organoid budding, leading to the development of symmetrical spheres that were either  
177 develop into enterocysts or remain as undifferentiated (Serra et al., 2019). The loss of Paneth cells,  
178 proliferation of undifferentiated progenitor cells, and formation of symmetrical spherical organoids  
179 resulting from elimination of *Lsr* in the intestine led us to test whether abnormal YAP activation  
180 contributes to these phenotypes. Confocal imaging showed a colocalization of YAP with LSR in mouse  
181 intestine and *Lgr5*<sup>+</sup> ISCs (Figure 4A), indicating that LSR might have a regulatory effect on YAP.  
182 Additionally, in *Lsr*<sup>-/-</sup>, *Lsr*<sup>vill KO</sup> and *Lsr*<sup>ISC KO</sup> mouse models, we observed enhanced YAP protein  
183 abundance accompanied by increased mRNA expression of the well-established YAP target genes, such  
184 as *Edn1*, *Ctgf*, and *Cyr61* (Fan et al., 2022), in the small intestine (Figure 4B-G), but the mRNA  
185 expression level of *Yap* did not change significantly (Figure 4E-G). To test directly whether elevated  
186 YAP contributes to the phenotype caused by LSR deletion, we lowered YAP signaling in *Lsr*<sup>vill KO</sup> mice  
187 with verteporfin (VP), a pharmacologic inhibitor of YAP-TEAD association, twice per day from  
188 postnatal day 7 to day 21. The expression of MPTX2 was found to be significantly increased in small  
189 intestine of VP-treated *Lsr*<sup>vill KO</sup> mice (Figure 4H). In addition, the mRNA levels of Paneth cell markers  
190 were significantly increased in VP-treated *Lsr*<sup>vill KO</sup> mice (Figure S2F). These results indicated that VP  
191 treatment restored Paneth cell number. H&E staining showed that the small intestinal villi  
192 hyperproliferation were also partially suppressed in VP-treated *Lsr*<sup>vill KO</sup> mice (Figure 4I). The expression  
193 of several YAP target genes was significantly suppressed by VP treatment (Figure 4J), indicating  
194 decreased YAP signaling in intestine of VP-treated *Lsr*<sup>vill KO</sup> mice. Similar results were observed in *Lsr*<sup>vill</sup>  
195 <sup>KO</sup> mice treated with lentiviruses carrying the *Yap* shRNA (Figure 4K-M; Figure S2G). These  
196 observations strongly support the causal link between the LSR-dependent YAP regulation and the altered  
197 Paneth cell differentiation in *Lsr*-null mice.

198 Next, we sought to verify the importance of YAP to the phenotype of *Lsr*-deficient intestine. We  
199 examined the expression of YAP in ISCs *in vitro*, and found that *Lsr* deletion led to significant increases

200 in YAP expression and nuclear translocation in the  $Lsr^{ISC\ KO}$  (Figure 4N) and  $Lsr^{vill\ KO}$  ISCs (Figure S2H)  
201 compared to  $Lsr^{ctrl}$  ISCs. *Yap* shRNA lentiviral transduction reduced the levels of *Yap* down to 30% in  
202 organoids (Figure S2I), and rescued de novo crypt formation (Figure S2J) and normalized Paneth cell  
203 differentiation (Figure S2K). Taken together, these results confirmed a role for YAP activation in  
204 regulation of ISCs function downstream of LSR.

205 Wnt/ $\beta$ -catenin signaling pathway was discovered to be required for intestinal homeostasis and Paneth  
206 cell differentiation (Totaro et al., 2018). However,  $\beta$ -catenin of crypts in the  $Lsr^{vill\ KO}$  and  $Lsr^{ISC\ KO}$  mice  
207 was similar to that of control crypts (Figure S2L and M). Activation of YAP has been reported to directly  
208 inhibit Wnt signaling in the intestine (Cheung et al., 2020; Li et al., 2020), but LSR knockout did not  
209 affect expression of most of the  $\beta$ -catenin-target genes including *Ccnd1*, *Axin2*, and *Cd44* in both the  
210 intestinal tissue and *Lgr5*<sup>+</sup> ISCs isolated from  $Lsr^{vill\ KO}$  and  $Lsr^{ctrl}$  mice (Figure S2N and O). This data  
211 may be due to alterations in negative feedback mediators in the Wnt pathway. Further, both ATOH1 and  
212 SOX9, two critical transcription factors for the differentiation of intestinal Paneth cell lineage, were not  
213 significantly altered by *Lsr* ablation in ISCs (Figure S2P-R).

#### 214 **14-3-3 zeta and PP2Ac are involved in the regulation of YAP by LSR**

215 The above data clearly indicate a role of LSR on YAP expression and activation, we examined in closer  
216 detail whether Hippo pathway activity, which negatively regulates YAP, is perturbed by LSR ablation.  
217 Immunoblot analysis indicated that LSR ablation actually led to up-regulation of phosphorylated large  
218 tumor suppressor (p-Lats1) (Figure S3A and B), a component of the mammalian Hippo pathway, which  
219 inhibits YAP nuclear translocation and promotes its proteasomal degradation. We conjectured that the  
220 elevation of p-Lats1 is induced by YAP activation via a potential negative feedback mechanism.  
221 Moreover, the increase of YAP protein level was not due to increased transcription, since *Yap* mRNA  
222 was slightly decreased in the small intestine (Figure 4F and G). We speculated that *Lsr* deletion may  
223 affect the metabolism of YAP and cause its protein level to increase, therefore, a protein synthesis  
224 inhibitor (cycloheximide, CHX) and a proteasome inhibitor (MG132) were used to determine the effect  
225 of LSR on YAP metabolism. The degradation rate of YAP in the  $Lsr^{vill\ KO}$  group was significantly lower  
226 than that in the  $Lsr^{ctrl}$  group after CHX treatment (Figure 5A). Moreover, MG132 blocked the turnover



227 of YAP in the presence of CHX, and deletion of *Lsr* had an effect similar to that of MG132 on blocking  
228 YAP turnover (Figure 5B). Thus, deletion of LSR might increase YAP accumulation by suppressing its  
229 proteasomal degradation. Phosphorylation of YAP at Ser381 can increase its ubiquitination, ultimately  
230 leading to proteasomal degradation (Zhao et al., 2010). Decreased p-YAP (Ser381) (Figure 5C) and YAP  
231 ubiquitination (Figure 5D) were observed in the ISCs isolated from *Lsr<sup>vill</sup> KO* mice. These results  
232 demonstrated that *Lsr* knockout enhanced YAP stability by decreasing its phosphorylation at Ser381,  
233 thereby blocking its ubiquitination and degradation.

234 We next sought to determine the molecular mechanism through which LSR regulate the phosphorylation  
235 of YAP. We performed a mass spectrometry analysis of LSR immunocomplexes from ISCs. Results  
236 identified a list of 289 cellular proteins that specifically interact with LSR. We focused on two 14-3-3  
237 proteins, 14-3-3 zeta and 14-3-3 gamma, and two protein phosphatases, protein phosphatase 1 catalytic  
238 subunit alpha (PPP1CA) and PP2Ac (Figure 5E), because they have been reported to participate in the  
239 regulation of YAP in multiple tissues (Hu et al., 2017; Meng et al., 2016; Schlegelmilch et al., 2011). It  
240 is also known that the turnover of YAP is regulated through its phosphorylation and ubiquitination in a  
241 14-3-3 dependent manner. Remarkably, coimmunoprecipitation (co-IP) and immunoblot analysis of *in*  
242 *vivo* and *in vitro* samples confirmed that 14-3-3 zeta interacted with both YAP and LSR (Figure 5F,  
243 Figure S3C), but 14-3-3 gamma, PPP1CA, or PP2Ac did not interact with YAP or LSR either *in vivo* or  
244 *in vitro* (Figure S3D-H, Figure 5G). PPP1CA and PP2Ac have been reported to be phosphatases that  
245 directly and effectively dephosphorylate YAP (Ser381). An antagonistic and competitive interaction has  
246 been reported between PP2Ac and 14-3-3 for the phosphorylation of YAP (Schlegelmilch et al., 2011).  
247 Hence, we tested whether deletion of LSR results in an increased association of YAP with PP2Ac or  
248 PPP1CA. YAP interacted with PP2Ac instead of PPP1CA and exhibited reduced binding to 14-3-3 zeta  
249 in the ISCs from *Lsr<sup>vill</sup> KO* mouse intestine (Figure 5H and Figure S3I) and HEK293 cells transfected with  
250 YAP, 14-3-3 zeta and PP2Ac expression plasmids (Figure S3J), while LSR and YAP did not seem to  
251 bind to PP2Ac in the ISCs from *Lsr<sup>ctrl</sup>* mouse intestine or HEK293 cells (Figure 5G and Figure S3H).  
252 Therefore, YAP could interact with 14-3-3 zeta and PP2Ac respectively, and deletion of LSR might  
253 increase the interaction between YAP and PP2Ac by decreasing the YAP/14-3-3 zeta association. To  
254 determine whether PP2Ac can efficiently dephosphorylate YAP (Ser381), an *in vitro* phosphatase assay  
255 is performed in the presence of PP2Ac. The presence of PP2Ac resulted in diminished YAP (Ser381)

256 phosphorylation and YAP accumulation (Figure 5I). These results suggested that loss of *Lsr* leads to  
257 more efficient association of YAP with PP2Ac, which can potentially dephosphorylate YAP at Ser381  
258 and thereby decrease its degradation.

### 259 **Loss of *Lsr* exacerbates inflammation in a mouse model of NEC**

260 Paneth cells, which are enriched in the ileum, have a central role in preventing intestinal inflammation  
261 (Adolph et al., 2013) and defects in Paneth cells are a hallmark of NEC. Infants who have developed  
262 NEC have decreased Paneth cell numbers compared to age-matched controls (Coutinho et al., 1998), and  
263 ablation of murine Paneth cells results in a NEC-like phenotype (Lueschow et al., 2018). We speculated  
264 that Paneth cell loss caused by LSR deletion may render the immature small intestine susceptible to  
265 development of NEC. Hence, to evaluate the role of LSR in NEC, we used 2,4,6-trinitrobenzenesulfonic  
266 acid (TNBS) to establish NEC models. Enteral administration of TNBS in 14-day-old mouse pups  
267 induced NEC, as revealed by villus disruption, clear separation of lamina propria and edema in the  
268 submucosa (Figure S4A and Figure 6A), increased mRNA levels of proinflammatory factors, including  
269 *Il-1 $\alpha$* , *Il-2*, *Il-6*, *Ifn- $\gamma$*  and *Tnf- $\alpha$*  (Figure 6B), and increased infiltration of inflammatory cells  
270 (macrophages and neutrophil, Figure S4B and C, Figure 6C and D) in small intestine of mice treated  
271 with TNBS in *Lsr*<sup>ctrl</sup> mice. As expected, LSR expression was significantly decreased in the small  
272 intestines of mice treated with TNBS (Figure 6E and F), and the number of Paneth cells was also  
273 significantly reduced (Figure S4D, Figure 6G and H). Compared with *Lsr*<sup>ctrl</sup> mice, *Lsr*<sup>vill<sup>KO</sup></sup> mice showed  
274 worsening intestinal injury, represented by more severe transmural injury in the small intestine (Figure  
275 S4E and Figure 6I), increased mRNA levels of proinflammatory factors (Figure 6J), and increased  
276 infiltration of macrophages and neutrophils (Figure S4F and G, Figure 6K and L) after NEC induction.  
277 Collectively, these results implied that the lack of LSR led to more severe NEC. To further explore the  
278 effect of LSR on NEC, we established the NEC model in mice transduced with AAV encoding mouse  
279 *Lsr* (AAV-*Lsr*) or control vector (AAV-CTL). The LSR overexpression AAV decreased the severity of  
280 TNBS induced NEC (Figure S4H and Figure 6M), suppressed cytokines production (Figure 6N),  
281 decreased inflammatory cells infiltration (Figure S4 I and J; Figure 6O and P), and preserved Paneth cell  
282 number (Figure 6Q and R) in the small intestine of AAV-*Lsr* treated mice. These results suggest that  
283 LSR protects against TNBS induced NEC through upregulation of Paneth cell. To further verify the role

284 of LSR in NEC, we tested intestinal samples from NEC patients. Compared with healthy control, patients  
285 with NEC exhibited severe intestinal injury (Figure 6S) and significantly reduced expression of LSR  
286 (Figure 6T), especially in ISCs (Figure 6U). Similar to previous reports (Underwood, 2012), infants with  
287 NEC have significantly decreased numbers of Paneth cells compared to age-matched controls (Figure  
288 6V). These results confirmed that LSR plays an important role in the development of NEC and is  
289 expected to be a potential therapeutic target for NEC.

## 290 **Discussion**

291 Although the abundant expression of LSR has been described in intestine (Mesli et al., 2004; Sugawara  
292 et al., 2021), roles of this receptor in intestinal development, physiology and disease remain unclear. Here,  
293 we generated multiple conditional deletion mouse models to identify roles for LSR in the intestinal  
294 epithelium. We show that genetic ablation of *Lsr* in the intestinal epithelium results in increased numbers  
295 of proliferating cells, as well as a reduction in Paneth cell lineage. We demonstrate that the numbers of  
296 *Lgr5*<sup>+</sup> ISCs quantified by OLFM4 immunostaining displayed no significant difference between *Lsr*<sup>vill KO</sup>  
297 and control samples, suggesting that the associated increase in proliferating cells in *Lsr*<sup>vill KO</sup> crypts is  
298 likely due to increased progenitor cell numbers. Strikingly, elimination of LSR from the intestinal  
299 epithelium or *Lgr5*<sup>+</sup> ISCs resulted in almost complete disappearance of Paneth cell lineage, but had no  
300 effect on the number and distribution of other types of cells in small intestine. The disappearance of  
301 Paneth cell was reproduced in the tamoxifen-inducible *Lsr*<sup>-/-</sup> and *Lsr*<sup>ISC KO</sup> mice. An *ex vivo* organoid-  
302 forming assay showed that intestinal crypts from *Lsr*<sup>vill KO</sup> mice or iPSCs with LSR knockdown formed  
303 symmetrical spherical organoids without Paneth cell lineage, implying that LSR plays a key role in the  
304 regulation of ISC function and differentiation toward Paneth cells in the intestinal epithelium.

305 YAP is a regulator of intestinal regeneration and ISCs fate (Gjorevski et al., 2022). We here show that  
306 the loss of LSR causes an increased abundance and enhanced nuclear translocation of YAP in *Lsr*<sup>-/-</sup> and  
307 *Lsr*<sup>vill KO</sup> intestinal epithelium and in *Lsr*<sup>ISC KO</sup> ISCs. As for now, the molecular events and functional  
308 consequences that follow YAP activation remain controversial (Barry et al., 2013; Cai et al., 2010;  
309 Cheung et al., 2020; Gregorieff et al., 2015; Li et al., 2020; Zhou et al., 2011). Previous work has shown  
310 that overexpression of YAP results in enhanced proliferation of stem cell compartment and loss of

311 differentiated cell types in small intestine (Camargo et al., 2007). Mice deficient for Hippo components  
312 Mst1 and Mst2 exhibited an expansion of stem-like undifferentiated cells and the almost complete  
313 disappearance of all secretory lineages, due to an increased abundance and enhanced nuclear  
314 translocation of YAP caused by the loss of Mst1/Mst2 (Zhou et al., 2011). Recent studies by several  
315 group have demonstrated that removal of Lats1/2, which caused the increase of YAP/TAZ expression  
316 and nuclear accumulation, resulted in expansion of the transit-amplifying population (Guillermin et al.,  
317 2021; Li et al., 2020). In agreement with these findings, the small intestine in *Lsr*<sup>-/-</sup> and *Lsr*<sup>vill KO</sup> mice  
318 was significantly thickened accompanied by increased number of transit-amplifying cells. However,  
319 genetic ablation of *Lsr* only resulted in loss of Paneth cell lineage, stem cells survived and produced  
320 various cell types of intestinal epithelium. Although Paneth cell development is tightly controlled by both  
321 Wnt and Notch pathways and their downstream transcription factors, recent studies pointed out that  
322 spatial heterogeneities in YAP activity are required for intestinal tissue morphogenesis, and homogeneous  
323 inhibitions or overexpression of YAP in all cells reduces Paneth cell differentiation (Gjorevski et al.,  
324 2022; Li, 2019). We confirm this finding and observe that homogeneous upregulation of YAP caused by  
325 LSR elimination from the intestinal epithelial compartment results in the almost complete disappearance  
326 of Paneth cell lineage.

327 Loss of Paneth cells was confirmed in organoid cultures derived from *Lsr* knockout mouse crypts or  
328 human iPSCs with stable *LSR* knockdown. Moreover, LSR deletion resulted in the formation of only  
329 symmetrical spherical organoids from mouse crypts or human iPSCs. These phenotypes are similar to  
330 YAP-overexpression organoids, where YAP is homogeneously active in all cells, and neither form Paneth  
331 cells nor display symmetry breaking (Serra et al., 2019). Originally, the transcriptional regulator YAP  
332 can stimulate single stem cells to enter a regenerative state and form a symmetric organoid (Serra et al.,  
333 2019); then, the emergence of Paneth cells can break the symmetry of the organoid, followed by of  
334 budding and the formation of villus structures (Chacon-Martinez et al., 2018; Sato et al., 2009). However,  
335 if YAP is overexpressed and localized in the nucleus, the symmetry cannot be broken, and the organoid  
336 remains spherical (Lukonin et al., 2020). Consistent with this concept, uniform induction in YAP activity,  
337 which also abrogated spatial gradients in YAP activity, resulted in *Lsr* knockout organoids remain  
338 symmetrical and contain no Paneth cells. Bearing in mind the pattern of YAP activity described above,  
339 we reasoned that uniform inhibition of YAP by treatment with *Yap* shRNA lentivirus could not restore

340 the ability of *Lsr* knockout ISCs to differentiate into Paneth cells. Following YAP targeted knockdown,  
341 however, we observed rescued de novo crypt formation and enhanced Paneth cell number in *Lsr* mutant  
342 organoid. We do not currently know why such a difference exists. One possibility is that although  
343 lentiviral transduction is a highly efficient method to introduce targeted gene in organoids, the number  
344 of integrations per cell can be variable in organoids, resulting in heterogeneous knockdown efficiency of  
345 YAP within the cell population.

346 Next, we investigated the disease relevance of intestinal LSR using NEC as an intestinal injury model.  
347 Although NEC's pathogenesis is multifactorial, Paneth cell depletion or dysfunction has been linked  
348 mechanistically to development of NEC . Our data clearly show that Paneth cell deficient mice caused  
349 by *Lsr* depletion displayed increased susceptibility to TNBS induced NEC. We found that the expression  
350 of LSR was significantly reduced in the intestines of NEC patients, and similar results were also obtained  
351 in NEC mouse models. Systemic delivery of LSR using an adenoviral delivery system profoundly  
352 inhibited the development and progression of NEC. These results reveal that LSR contributes to intestinal  
353 injury and disease progression in NEC, which will potentially advance our understanding of NEC,  
354 describe new biomarkers, and lead to novel therapeutic strategies for this multifactorial disease. It would  
355 be interesting to investigate the contribution of LSR to other gut inflammatory disorders such as Crohn's  
356 disease apart from NEC, because malfunctioning Paneth cells accelerate the progress of these disorders  
357 (Wehkamp and Stange, 2020).

358 YAP signaling activity can be regulated by multiple factors, however, extracellular ligands, cell surface  
359 receptors, and signaling pathways regulating YAP have not been thoroughly examined. Our results  
360 demonstrate that LSR can directly impact the differentiation of ISCs into Paneth cells via regulating the  
361 degradation of YAP in the ISCs (Figure S5). This study establishes an important regulatory role of LSR  
362 in restricting YAP activity, however, many questions remain. Are there additional direct or indirect effects  
363 of LSR on YAP signaling activity? Are these tissue-specific or universal? Whether LSR can be used to  
364 combat excess YAP activity? Can LSR also act independently of the YAP pathway to control intestinal  
365 epithelium homeostasis? Intense studies are currently underway in our laboratory to address those  
366 important questions.

367 **Competing Interests statement**

368 The authors declare no competing financial interests.

369 **Author contributions**

370 Y. A., C. W., and B. F. designed and conducted *in vivo* and *in vitro* experiments, performed data analysis,  
371 and wrote the manuscript. Y. L., F. K., C. Z. and Z. C. performed histologic analysis. J. L., M. W. and H.  
372 S. performed mice genotyping. Y. G. and S. Z. designed and jointly supervised the study, analyzed the  
373 data, and wrote the manuscript.

374 **Acknowledgments**

375 We thank Ping Li for animal husbandry. We thank the electron microscopic core lab of Shandong  
376 University for assistance on electron microscopy imaging. The work is funded by National Natural  
377 Science Foundation of China (81670620, 81870485, 81970578, 81971281 and 32200758), Taishan  
378 Scholars Program of Shandong Province (ts20190953), Natural Science Foundation of Shandong  
379 Province (ZR2020QH066, ZR2021QH115 and ZR2021QC105), Shandong First Medical University  
380 Academic Promotion Program (2020LI001), and Binzhou Medical University Independent Research  
381 Program.

382 **References**

383 Adolph, T.E., Tomczak, M.F., Niederreiter, L., Ko, H.J., Bock, J., Martinez-Naves, E., Glickman, J.N.,  
384 Tschurtschenthaler, M., Hartwig, J., Hosomi, S., *et al.* (2013). Paneth cells as a site of origin for  
385 intestinal inflammation. *Nature* *503*, 272-276.  
386 Barry, E.R., Morikawa, T., Butler, B.L., Shrestha, K., de la Rosa, R., Yan, K.S., Fuchs, C.S., Magness,  
387 S.T., Smits, R., Ogino, S., *et al.* (2013). Restriction of intestinal stem cell expansion and the  
388 regenerative response by YAP. *Nature* *493*, 106-110.  
389 Cai, J., Zhang, N., Zheng, Y., de Wilde, R.F., Maitra, A., and Pan, D. (2010). The Hippo signaling  
390 pathway restricts the oncogenic potential of an intestinal regeneration program. *Genes &*  
391 *development* *24*, 2383-2388.  
392 Camargo, F.D., Gokhale, S., Johnnidis, J.B., Fu, D., Bell, G.W., Jaenisch, R., and Brummelkamp, T.R.  
393 (2007). YAP1 increases organ size and expands undifferentiated progenitor cells. *Current biology* :  
394 *CB* *17*, 2054-2060.  
395 Chacon-Martinez, C.A., Koester, J., and Wickstrom, S.A. (2018). Signaling in the stem cell niche:  
396 regulating cell fate, function and plasticity. *Development* *145*.

397 Cheung, P., Xiol, J., Dill, M.T., Yuan, W.C., Panero, R., Roper, J., Osorio, F.G., Maglic, D., Li, Q., Gurung,  
398 B., *et al.* (2020). Regenerative Reprogramming of the Intestinal Stem Cell State via Hippo Signaling  
399 Suppresses Metastatic Colorectal Cancer. *Cell stem cell* *27*, 590-604 e599.

400 Coutinho, H.B., da Mota, H.C., Coutinho, V.B., Robalinho, T.I., Furtado, A.F., Walker, E., King, G.,  
401 Mahida, Y.R., Sewell, H.F., and Wakelin, D. (1998). Absence of lysozyme (muramidase) in the  
402 intestinal Paneth cells of newborn infants with necrotising enterocolitis. *Journal of clinical*  
403 *pathology* *51*, 512-514.

404 Dong, X., Zhang, X.B., Liu, P., Tian, Y., Li, L., and Gong, P. (2022). Lipolysis-Stimulated Lipoprotein  
405 Receptor Impairs Hepatocellular Carcinoma and Inhibits the Oncogenic Activity of YAP1 via PPPY  
406 Motif. *Front Oncol* *12*.

407 Fan, S., Gao, Y., Qu, A., Jiang, Y., Li, H., Xie, G., Yao, X., Yang, X., Zhu, S., Yagai, T., *et al.* (2022). YAP-  
408 TEAD mediates PPAR alpha-induced hepatomegaly and liver regeneration in mice. *Hepatology*  
409 *75*, 74-88.

410 Gjorevski, N., Nikolaev, M., Brown, T.E., Mitrofanova, O., Brandenberg, N., DeRiio, F.W., Yavitt, F.M.,  
411 Liberali, P., Anseth, K.S., and Lutolf, M.P. (2022). Tissue geometry drives deterministic organoid  
412 patterning. *Science* *375*, eaaw9021.

413 Gregorieff, A., Liu, Y., Inanlou, M.R., Khomchuk, Y., and Wrana, J.L. (2015). Yap-dependent  
414 reprogramming of Lgr5(+) stem cells drives intestinal regeneration and cancer. *Nature* *526*, 715-  
415 718.

416 Guillermin, O., Angelis, N., Sidor, C.M., Ridgway, R., Baulies, A., Kucharska, A., Antas, P., Rose, M.R.,  
417 Cordero, J., Sansom, O., *et al.* (2021). Wnt and Src signals converge on YAP-TEAD to drive intestinal  
418 regeneration. *The EMBO journal* *40*, e105770.

419 Hemmasi, S., Czulkies, B.A., Schorch, B., Veit, A., Aktories, K., and Papatheodorou, P. (2015).  
420 Interaction of the Clostridium difficile Binary Toxin CDT and Its Host Cell Receptor, Lipolysis-  
421 stimulated Lipoprotein Receptor (LSR). *The Journal of biological chemistry* *290*, 14031-14044.

422 Hu, J.K., Du, W., Shelton, S.J., Oldham, M.C., DiPersio, C.M., and Klein, O.D. (2017). An FAK-YAP-  
423 mTOR Signaling Axis Regulates Stem Cell-Based Tissue Renewal in Mice. *Cell stem cell* *21*, 91-106  
424 e106.

425 Li, Q., Sun, Y., Jarugumilli, G.K., Liu, S., Dang, K., Cotton, J.L., Xiol, J., Chan, P.Y., DeRan, M., Ma, L.,  
426 *et al.* (2020). Lats1/2 Sustain Intestinal Stem Cells and Wnt Activation through TEAD-Dependent  
427 and Independent Transcription. *Cell stem cell* *26*, 675-692 e678.

428 Li, V.S.W. (2019). Yap in regeneration and symmetry breaking. *Nature cell biology* *21*, 665-667.

429 Lueschow, S.R., Stumphy, J., Gong, H., Kern, S.L., Elgin, T.G., Underwood, M.A., Kalanetra, K.M., Mills,  
430 D.A., Wong, M.H., Meyerholz, D.K., *et al.* (2018). Loss of murine Paneth cell function alters the  
431 immature intestinal microbiome and mimics changes seen in neonatal necrotizing enterocolitis.  
432 *PloS one* *13*, e0204967.

433 Lukonin, I., Serra, D., Challet Meylan, L., Volkmann, K., Baaten, J., Zhao, R., Meeusen, S., Colman, K.,  
434 Maurer, F., Stadler, M.B., *et al.* (2020). Phenotypic landscape of intestinal organoid regeneration.  
435 *Nature* *586*, 275-280.

436 Masuda, S., Oda, Y., Sasaki, H., Ikenouchi, J., Higashi, T., Akashi, M., Nishi, E., and Furuse, M. (2011).  
437 LSR defines cell corners for tricellular tight junction formation in epithelial cells. *Journal of cell*  
438 *science* *124*, 548-555.

439 Meng, Z., Moroishi, T., and Guan, K.L. (2016). Mechanisms of Hippo pathway regulation. *Genes &*  
440 *development* *30*, 1-17.



441 Mesli, S., Javorschi, S., Berard, A.M., Landry, M., Priddle, H., Kivlichan, D., Smith, A.J., Yen, F.T., Bihain,  
442 B.E., and Darmon, M. (2004). Distribution of the lipolysis stimulated receptor in adult and  
443 embryonic murine tissues and lethality of LSR<sup>-/-</sup> embryos at 12.5 to 14.5 days of gestation.  
444 *European journal of biochemistry* *271*, 3103-3114.

445 Narvekar, P., Berriel Diaz, M., Kronen-Herzig, A., Hardeland, U., Strzoda, D., Stohr, S., Frohme, M.,  
446 and Herzig, S. (2009). Liver-specific loss of lipolysis-stimulated lipoprotein receptor triggers  
447 systemic hyperlipidemia in mice. *Diabetes* *58*, 1040-1049.

448 Papatheodorou, P., Carette, J.E., Bell, G.W., Schwan, C., Guttenberg, G., Brummelkamp, T.R., and  
449 Aktories, K. (2011). Lipolysis-stimulated lipoprotein receptor (LSR) is the host receptor for the  
450 binary toxin Clostridium difficile transferase (CDT). *Proceedings of the National Academy of*  
451 *Sciences of the United States of America* *108*, 16422-16427.

452 Reaves, D.K., Hoadley, K.A., Fagan-Solis, K.D., Jima, D.D., Bereman, M., Thorpe, L., Hicks, J.,  
453 McDonald, D., Troester, M.A., Perou, C.M., *et al.* (2017). Nuclear Localized LSR: A Novel Regulator  
454 of Breast Cancer Behavior and Tumorigenesis. *Mol Cancer Res* *15*, 165-178.

455 Resnik-Docampo, M., Koehler, C.L., Clark, R.I., Schinaman, J.M., Sauer, V., Wong, D.M., Lewis, S.,  
456 D'Alterio, C., Walker, D.W., and Jones, D.L. (2017). Tricellular junctions regulate intestinal stem cell  
457 behaviour to maintain homeostasis. *Nature cell biology* *19*, 52-59.

458 Sato, T., Vries, R.G., Snippert, H.J., van de Wetering, M., Barker, N., Stange, D.E., van Es, J.H., Abo,  
459 A., Kujala, P., Peters, P.J., *et al.* (2009). Single Lgr5 stem cells build crypt-villus structures in vitro  
460 without a mesenchymal niche. *Nature* *459*, 262-265.

461 Schlegelmilch, K., Mohseni, M., Kirak, O., Pruszkak, J., Rodriguez, J.R., Zhou, D., Kreger, B.T.,  
462 Vasioukhin, V., Avruch, J., Brummelkamp, T.R., *et al.* (2011). Yap1 acts downstream of alpha-catenin  
463 to control epidermal proliferation. *Cell* *144*, 782-795.

464 Serra, D., Mayr, U., Boni, A., Lukonin, I., Rempfler, M., Challet Meylan, L., Stadler, M.B., Strnad, P.,  
465 Papasaikas, P., Vischi, D., *et al.* (2019). Self-organization and symmetry breaking in intestinal  
466 organoid development. *Nature* *569*, 66-72.

467 Shimada, H., Abe, S., Kohno, T., Satohisa, S., Konno, T., Takahashi, S., Hatakeyama, T., Arimoto, C.,  
468 Kakuki, T., Kaneko, Y., *et al.* (2017). Loss of tricellular tight junction protein LSR promotes cell  
469 invasion and migration via upregulation of TEAD1/AREG in human endometrial cancer. *Sci Rep* *7*,  
470 37049.

471 Sohet, F., Lin, C., Munji, R.N., Lee, S.Y., Ruderisch, N., Soung, A., Arnold, T.D., Derugin, N., Vexler,  
472 Z.S., Yen, F.T., *et al.* (2015). LSR/angulin-1 is a tricellular tight junction protein involved in blood-  
473 brain barrier formation. *The Journal of cell biology* *208*, 703-711.

474 Sugawara, T., Furuse, K., Otani, T., Wakayama, T., and Furuse, M. (2021). Angulin-1 seals tricellular  
475 contacts independently of tricellulin and claudins. *The Journal of cell biology* *220*.

476 Takahashi, Y., Serada, S., Ohkawara, T., Fujimoto, M., Hiramatsu, K., Ueda, Y., Kimura, T., Takemori,  
477 H., and Naka, T. (2021). LSR promotes epithelial ovarian cancer cell survival under energy stress  
478 through the LKB1-AMPK pathway. *Biochem Bioph Res Co* *537*, 93-99.

479 Totaro, A., Panciera, T., and Piccolo, S. (2018). YAP/TAZ upstream signals and downstream  
480 responses. *Nature cell biology* *20*, 888-899.

481 Underwood, M.A. (2012). Paneth cells and necrotizing enterocolitis. *Gut microbes* *3*, 562-565.

482 Wehkamp, J., and Stange, E.F. (2020). An Update Review on the Paneth Cell as Key to Ileal Crohn's  
483 Disease. *Frontiers in immunology* *11*, 646.

484 Yen, F.T., Masson, M., Clossais-Besnard, N., Andre, P., Grosset, J.M., Bougueleret, L., Dumas, J.B.,



485 Guerassimenko, O., and Bihain, B.E. (1999). Molecular cloning of a lipolysis-stimulated remnant  
486 receptor expressed in the liver. *The Journal of biological chemistry* *274*, 13390-13398.  
487 Zhao, B., Li, L., Tumaneng, K., Wang, C.Y., and Guan, K.L. (2010). A coordinated phosphorylation  
488 by Lats and CK1 regulates YAP stability through SCF(beta-TRCP). *Genes & development* *24*, 72-  
489 85.  
490 Zhou, D., Zhang, Y., Wu, H., Barry, E., Yin, Y., Lawrence, E., Dawson, D., Willis, J.E., Markowitz, S.D.,  
491 Camargo, F.D., *et al.* (2011). Mst1 and Mst2 protein kinases restrain intestinal stem cell proliferation  
492 and colonic tumorigenesis by inhibition of Yes-associated protein (Yap) overabundance.  
493 *Proceedings of the National Academy of Sciences of the United States of America* *108*, E1312-  
494 1320.  
495

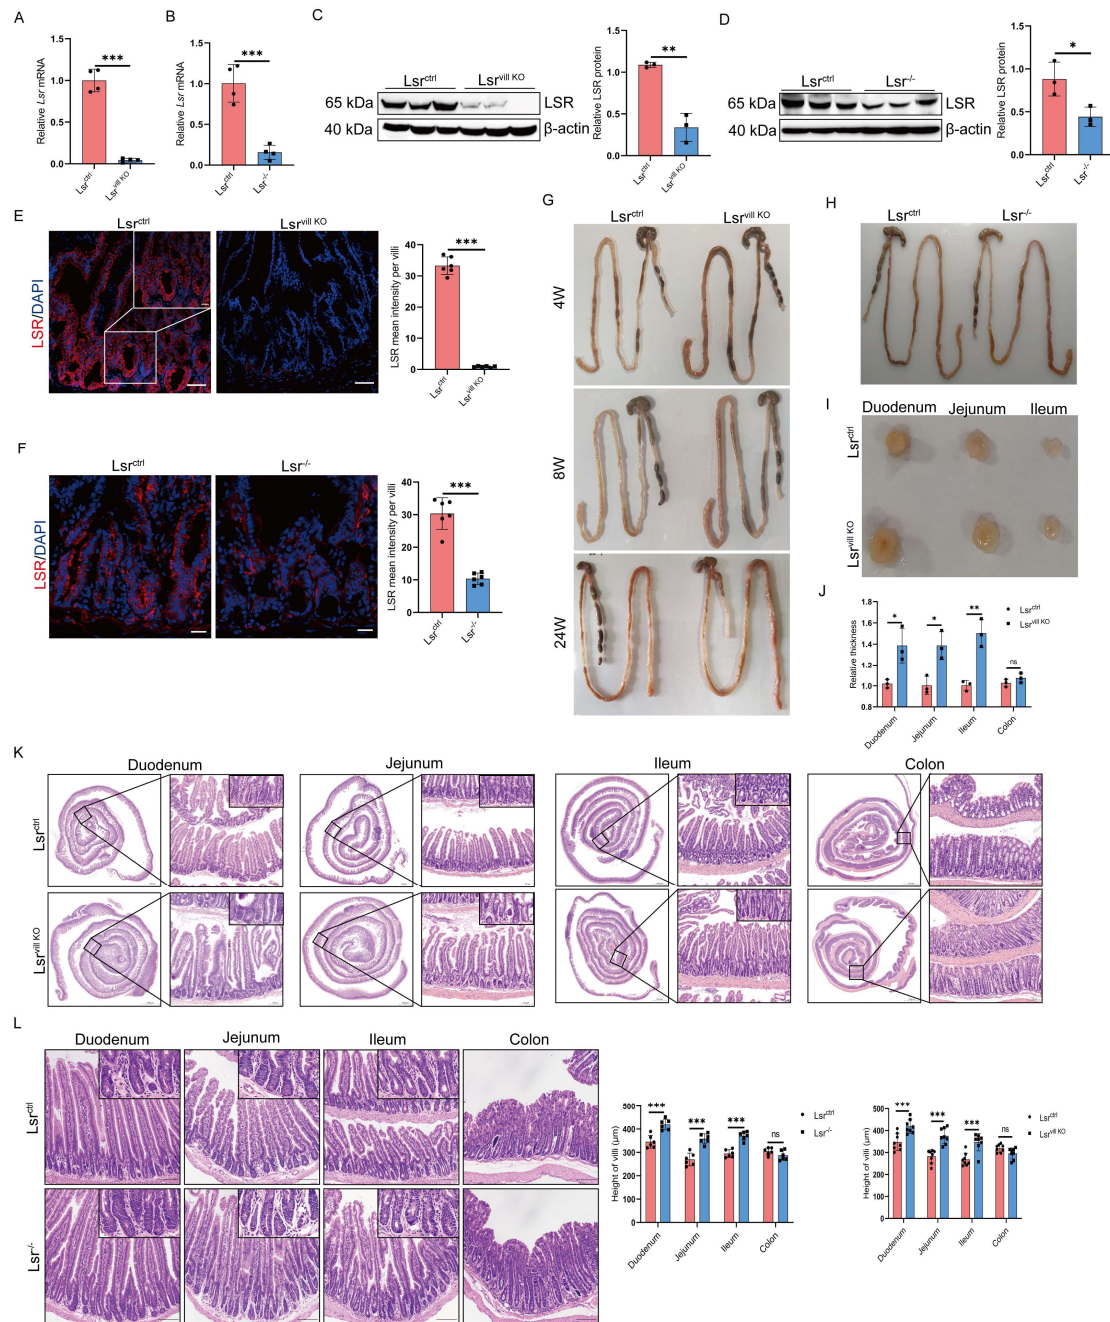

496

497 **Figure 1. Generation and characterization of conditional *Lsr* knockout mice.**

498 (A and B) Expression of *Lsr* mRNA assessed by qRT-PCR in small intestines from *Lsr<sup>ctrl</sup>* and *Lsr<sup>vill KO</sup>*

499 mice (A) and *Lsr<sup>ctrl</sup>* and *Lsr<sup>-/-</sup>* mice (B) (n=4). (C and D) Western blot and quantification analysis of LSR

500 in small intestines from *Lsr<sup>ctrl</sup>* and *Lsr<sup>vill KO</sup>* mice (C) and *Lsr<sup>ctrl</sup>* and *Lsr<sup>-/-</sup>* mice (D) (n=3). (E and F)

501 Immunofluorescence staining images and quantitative analysis of LSR in small intestines from *Lsr<sup>ctrl</sup>* and

502 *Lsr<sup>vill KO</sup>* mice (E) and *Lsr<sup>ctrl</sup>* and *Lsr<sup>-/-</sup>* mice (F) (n=6). (G) Longitudinal views of intestine from *Lsr<sup>ctrl</sup>*

503 and *Lsr<sup>vill KO</sup>* mice at 4, 8 and 24 weeks of age. (H) Longitudinal views of intestine from *Lsr<sup>ctrl</sup>* and *Lsr<sup>-/-</sup>*

504 mice. (I) Transverse views of intestine from *Lsr<sup>ctrl</sup>* and *Lsr<sup>vill KO</sup>* littermate mice. (J) Analysis of intestinal

505 wall thickness of Lsr<sup>ctrl</sup> and Lsr<sup>vill<sup>KO</sup></sup> mice (n=3). (K) Representative H&E-stained transverse segments  
506 and villi length quantification of Lsr<sup>ctrl</sup> and Lsr<sup>vill<sup>KO</sup></sup> mouse intestines (n=6). (L) Representative H&E-  
507 stained small intestine and villi length quantification of Lsr<sup>ctrl</sup> and Lsr<sup>-/-</sup> mice (n=6). Scale bars: E, 50  $\mu$ m;  
508 F, 20  $\mu$ m; K and J, 100  $\mu$ m. \**P* < 0.05, \*\**P* < 0.01, \*\*\**P* < 0.001.  
509

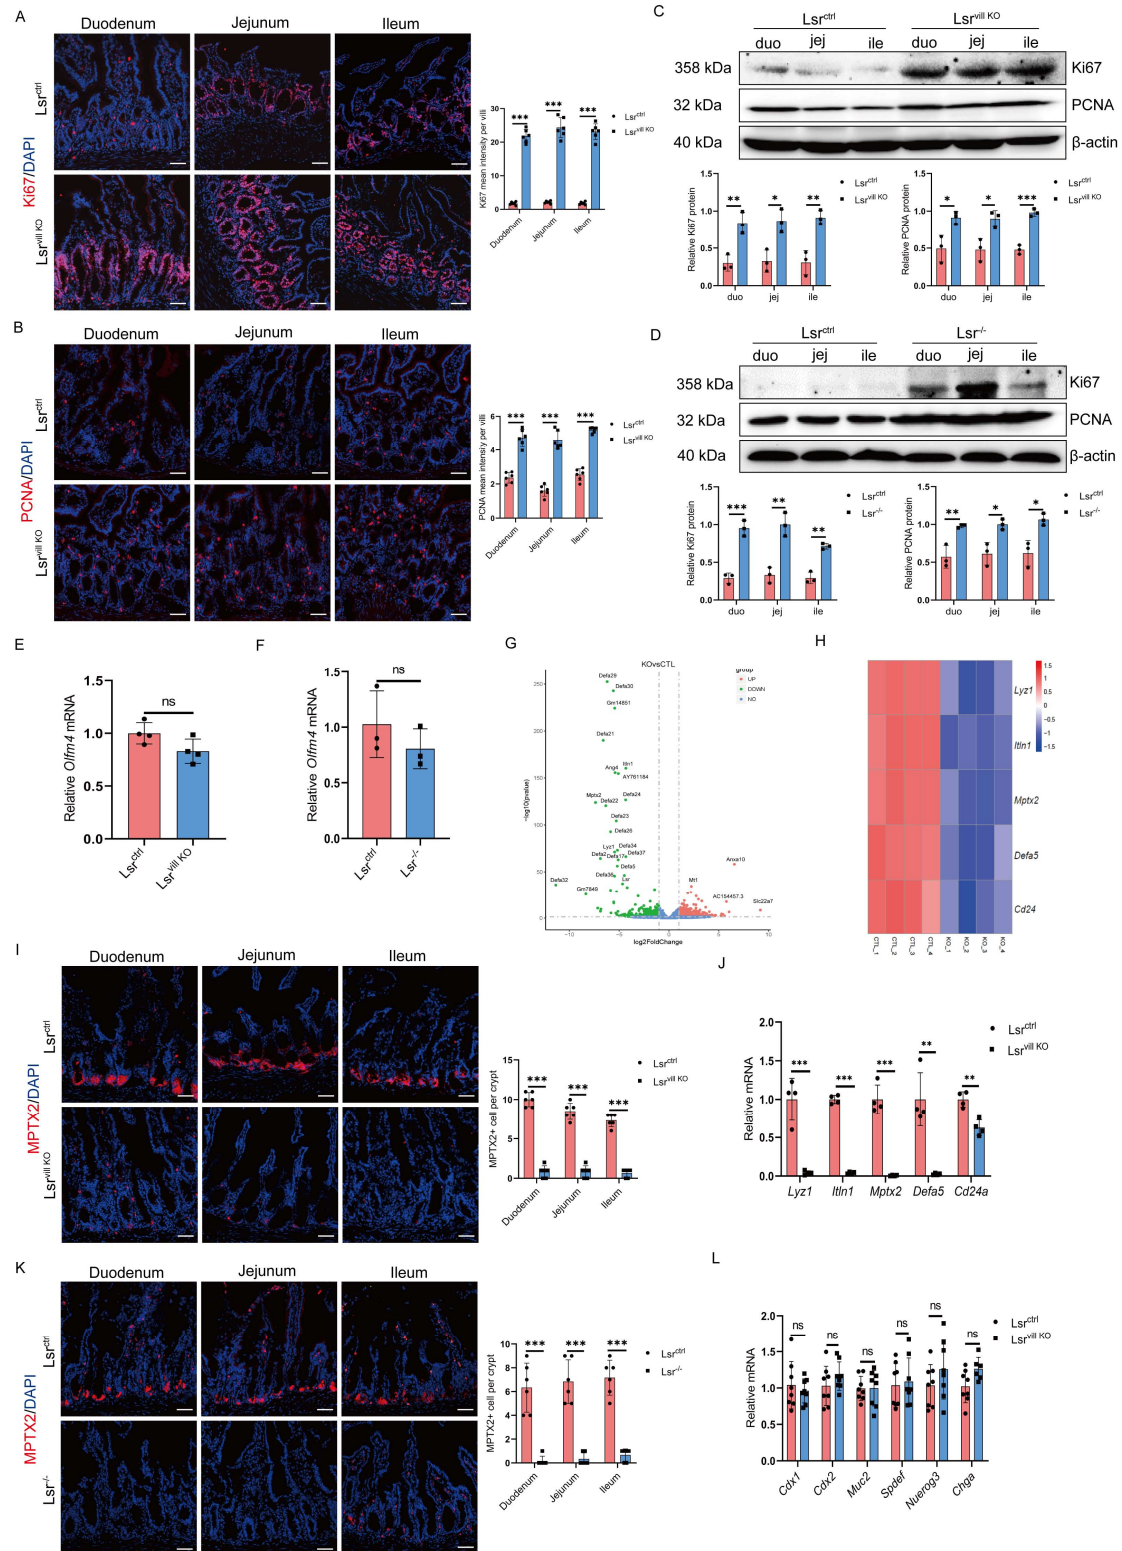

510

511 **Figure 2. LSR ablation results in increased numbers of proliferating cells and loss of Paneth cell**  
 512 **lineage in the small intestine.**

513 (A and B) Immunofluorescence staining images and quantitative analysis of Ki67 (A) and PCNA (B) in  
 514 duodenal, jejunal and ileal segments from Lsr<sup>ctrl</sup> and Lsr<sup>vill KO</sup> mice (n=6). (C and D) Western blot and  
 515 quantification analysis of Ki67 and PCNA protein expression in duodenal, jejunal and ileal segments

516 from  $Lsr^{ctrl}$  and  $Lsr^{vill KO}$  mice (C) and  $Lsr^{ctrl}$  and  $Lsr^{-/-}$  mice (D) (n=3). (E and F) Expression of *Olfm4*  
517 mRNA assessed by qRT-PCR in small intestines from  $Lsr^{ctrl}$  and  $Lsr^{vill KO}$  mice (E) and  $Lsr^{ctrl}$  and  $Lsr^{-/-}$   
518 mice (F) (n=4). (G) Differentially expressed genes ( $Lsr^{vill KO}$  vs.  $Lsr^{ctrl}$ ) are shown on a volcano plot (n=4;  
519 fold change > 2,  $P < 0.05$ ). (H) Heatmap showing unsupervised hierarchical clustering of Paneth cell-  
520 related genes. (I) Immunofluorescence staining images and quantitative analysis of MPTX2 in duodenal,  
521 jejunal and ileal segments from  $Lsr^{ctrl}$  and  $Lsr^{vill KO}$  mice (n=6). (J) qRT-PCR validating several  
522 downregulated Paneth cell markers in small intestines from  $Lsr^{ctrl}$  and  $Lsr^{vill KO}$  mice (n=4). (K)  
523 Immunofluorescence staining images and quantitative analysis of MPTX2 in duodenal, jejunal and ileal  
524 segments from  $Lsr^{ctrl}$  and  $Lsr^{-/-}$  mice (n=6). (L) qRT-PCR analysis of the mRNA expression of columnar  
525 absorptive cell markers (*Cdx1* and *Cdx2*), goblet cell markers (*Muc2* and *Spdef*), and enteroendocrine  
526 cell markers (*Neurog3* and *Chga*) in small intestines from  $Lsr^{ctrl}$  and  $Lsr^{vill KO}$  mice (n=8). Scale bars: A,  
527 B, I and K, 50  $\mu$ m. \* $P < 0.05$ , \*\* $P < 0.01$ , \*\*\* $P < 0.001$ .  
528



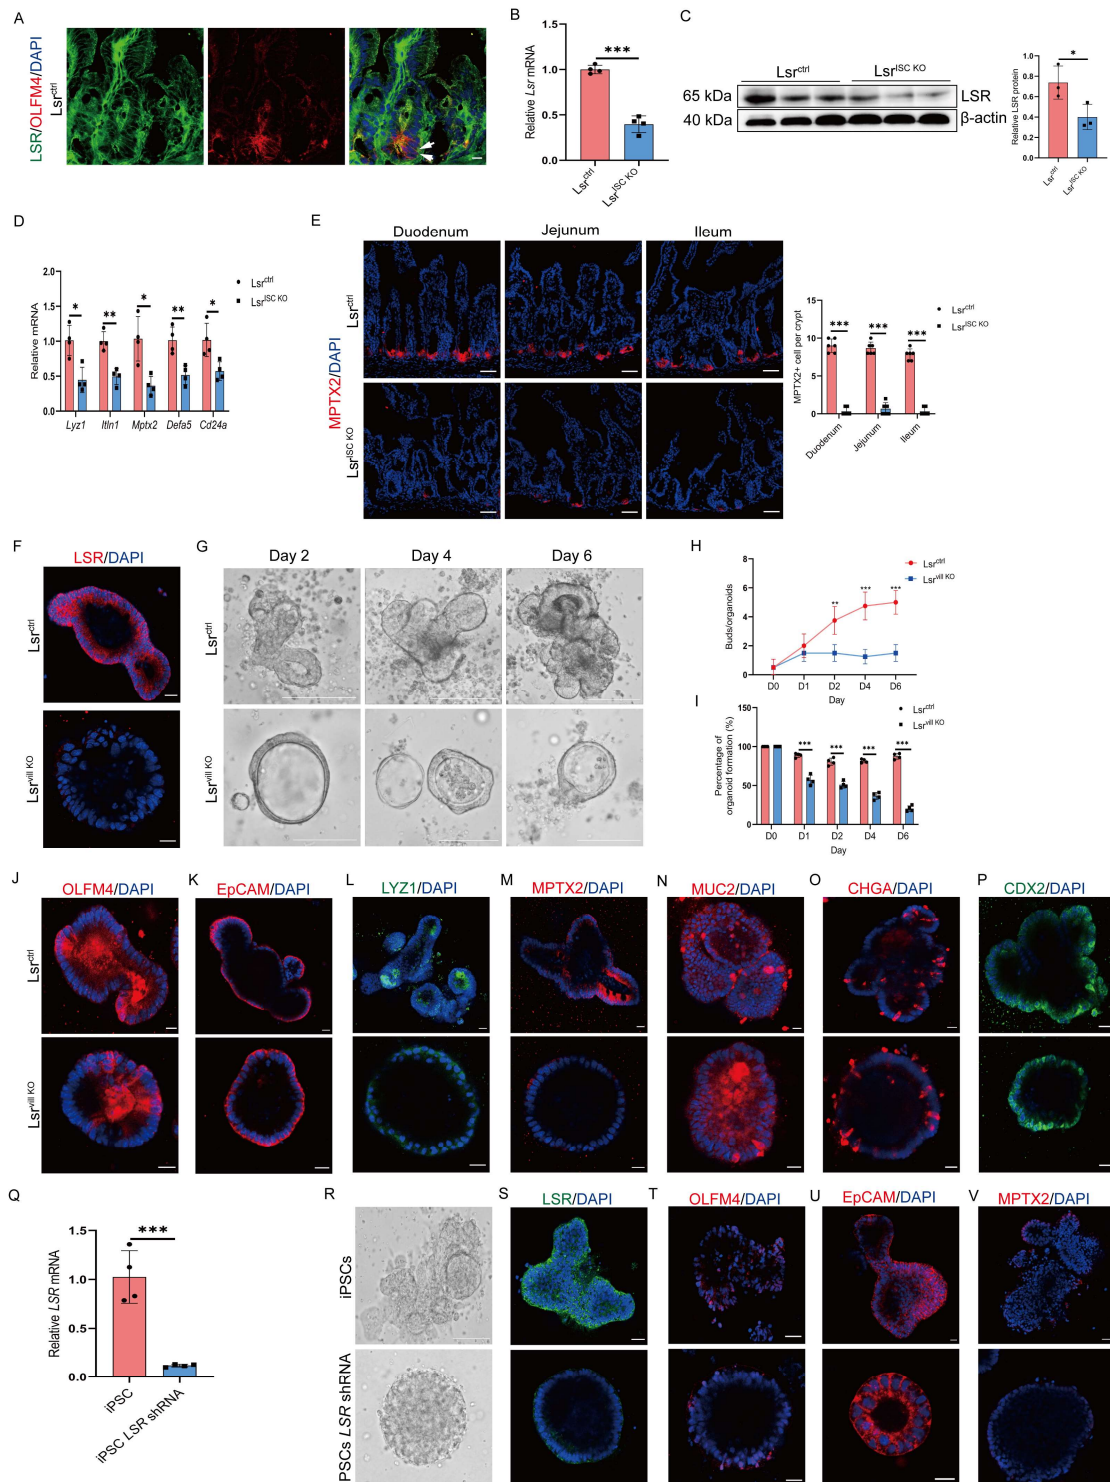

529

530 **Figure 3. LSR is required for *Lgr5*<sup>+</sup> ISC to Paneth cell differentiation.**

531 (A) Immunofluorescence staining images of LSR and OLFM4 in small intestines from *Lsr*<sup>ctrl</sup> mice

532 (arrows indicated colocalization of LSR and OLFM4 in ISCs). (B) Expression of *Lsr* mRNA assessed by

533 qRT-PCR in small intestines from *Lsr*<sup>ctrl</sup> and *Lsr*<sup>ISC KO</sup> mice (n=4). (C) Western blot and quantification

534 analysis of LSR in small intestines from *Lsr*<sup>ctrl</sup> and *Lsr*<sup>ISC KO</sup> mice (n=3). (D) Expression of Paneth cell

535 markers mRNA assessed by qRT-PCR in small intestines from *Lsr*<sup>ctrl</sup> and *Lsr*<sup>ISC KO</sup> mice (n=4). (E)

536 Immunofluorescence staining images and quantitative analysis of MPTX2 in duodenal, jejunal and ileal  
537 segments from  $Lsr^{ctrl}$  and  $Lsr^{ISC\ KO}$  mice (n=6). (F and G) LSR immunofluorescence (F) and bright field  
538 images (G) of organoids established from intestinal crypts of  $Lsr^{ctrl}$  and  $Lsr^{vill\ KO}$  mice. (H and I)  
539 Quantification of the average number of buds per organoid (H) and percentage of organoid formation per  
540 well (n=3 wells per group) (I). (J-P) Immunofluorescence staining images OLFM4 (J), EpCAM (K),  
541 LYZ1 (L), MPTX2 (M), MUC2 (N), CHGA (O) and CDX2 (P) in organoids established from intestinal  
542 crypts of  $Lsr^{ctrl}$  and  $Lsr^{vill\ KO}$  mice. (Q) Expression of *LSR* mRNA assessed by qRT-PCR in control and  
543 *LSR* knockdown human iPSCs (n=4). (R-V) Bright field images (R) and immunofluorescence staining  
544 images of LSR (S) OLFM4 (T), EpCAM (U) and MPTX2 (V) in organoids differentiated from control  
545 and *LSR* knockdown human iPSCs. Scale bars: A, 10 $\mu$ m; E, S, T and V, 50  $\mu$ m; F, J, K, L, M, N, O, P  
546 and U, 20  $\mu$ m; G and R, 125  $\mu$ m. \* $P < 0.05$ , \*\* $P < 0.01$ , \*\*\* $P < 0.001$ .  
547

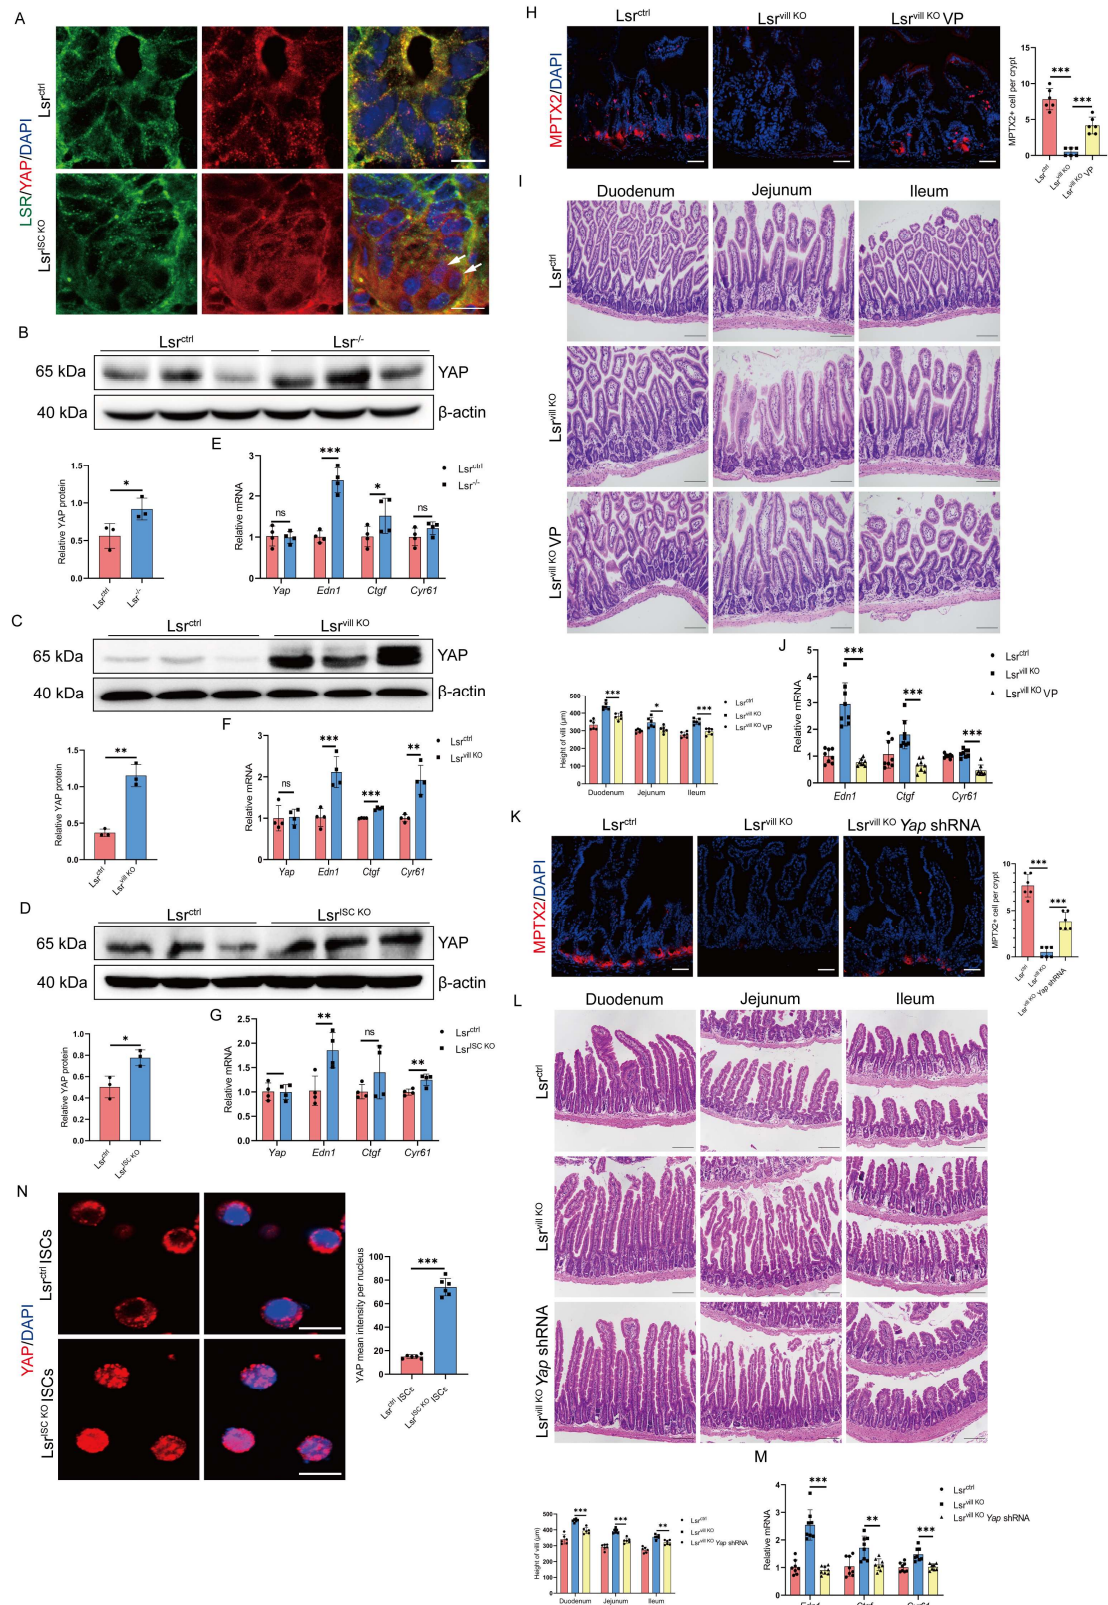

548

549 **Figure 4. Loss of LSR results in upregulation and activation of YAP.**

550 (A) Immunofluorescence staining images of LSR and YAP in small intestines from *Lsr<sup>ctrl</sup>* and *Lsr<sup>ISC KO</sup>*

551 mice (arrows indicated the ISCs). (B-D) Western blot and quantification analysis for YAP of small

552 intestine lysates from *Lsr<sup>ctrl</sup>* and *Lsr<sup>-/-</sup>* mice (B), *Lsr<sup>ctrl</sup>* and *Lsr<sup>vill KO</sup>* mice (C) and *Lsr<sup>ctrl</sup>* and *Lsr<sup>ISC KO</sup>* mice



553 (D) (n=3). (E-G) Expression of *Yap*, *Edn1*, *Ctgf*, and *Cyr61* mRNA assessed by qRT-PCR in small  
554 intestines from  $Lsr^{ctrl}$  and  $Lsr^{-/-}$  mice (E),  $Lsr^{ctrl}$  and  $Lsr^{vill KO}$  mice (F) and  $Lsr^{ctrl}$  and  $Lsr^{ISC KO}$  mice (G)  
555 (n=4). (H-J) Immunofluorescence staining images and quantitative analysis of MPTX2 (H), H&E  
556 staining and quantification analysis (I), and qRT-PCR analysis for YAP targets (J) in small intestines from  
557  $Lsr^{ctrl}$  mice,  $Lsr^{vill KO}$  mice, and  $Lsr^{vill KO}$  mice treated with VP (n=6). (K-M) Immunofluorescence staining  
558 images and quantitative analysis of MPTX2 (K), H&E staining and quantification analysis (L) and qRT-  
559 PCR analysis for YAP targets (M) in small intestine from  $Lsr^{ctrl}$  mice,  $Lsr^{vill KO}$  mice, and  $Lsr^{vill KO}$  mice  
560 treated with lentivirus expressing *Yap* shRNA (n=8). (N) Immunofluorescence staining images and  
561 quantitative analysis of YAP in ISCs isolated from  $Lsr^{ctrl}$  and  $Lsr^{ISC KO}$  mice (n=6). Scale bars: A and N,  
562 10  $\mu$ m; H and K, 50  $\mu$ m; I and L, 100  $\mu$ m. \* $P < 0.05$ , \*\* $P < 0.01$ , \*\*\* $P < 0.001$ .  
563

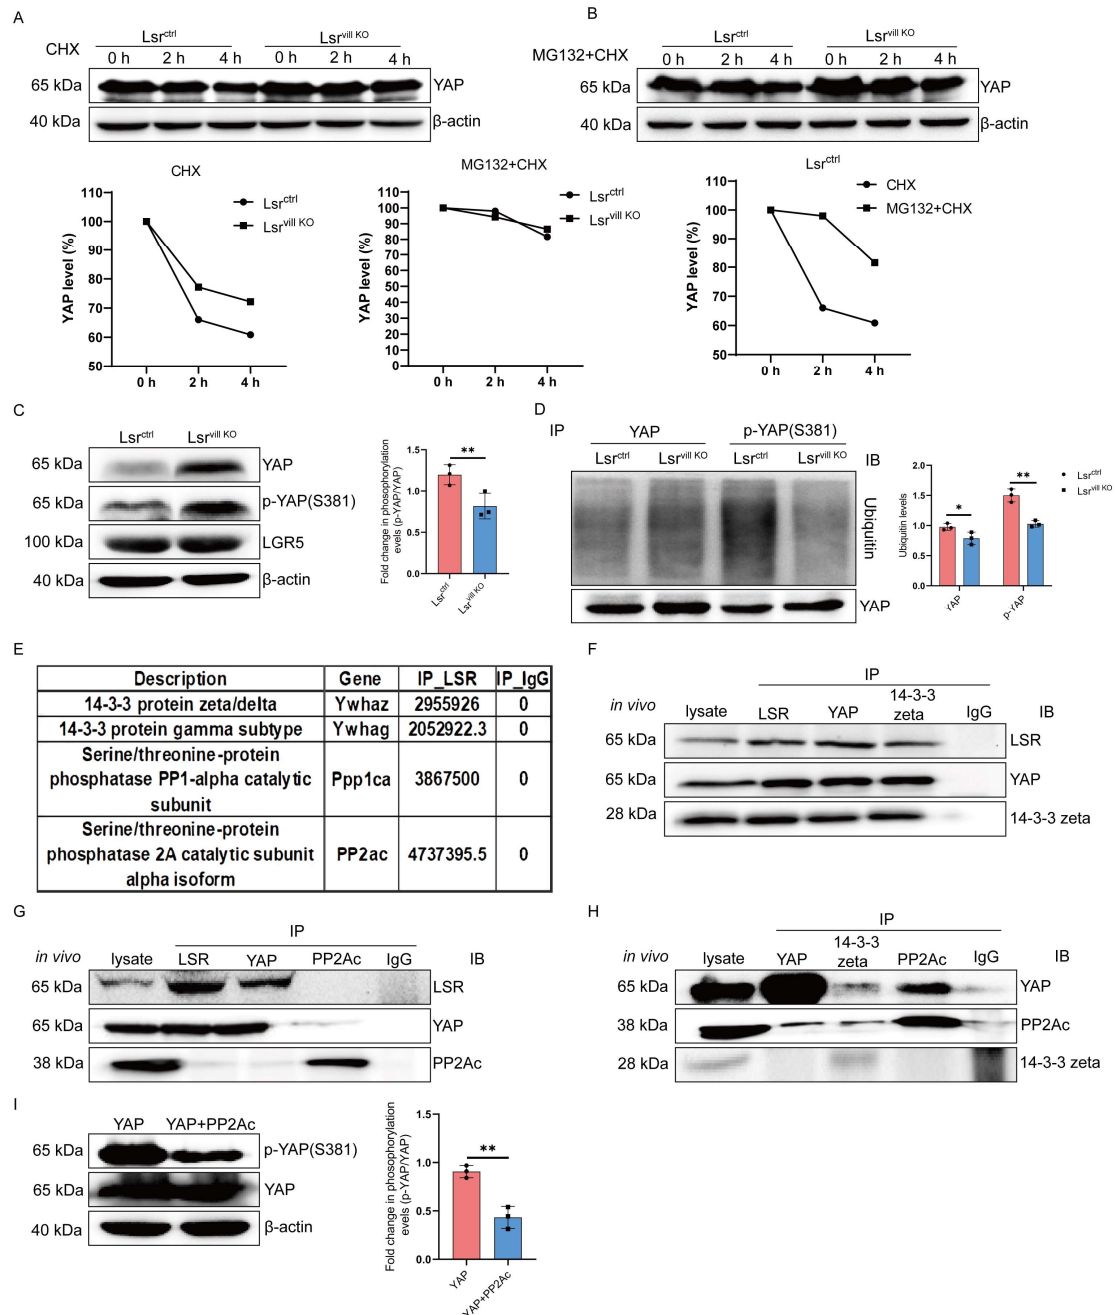

564

565 **Figure 5. 14-3-3 zeta and PP2Ac are involved in the regulation of YAP by LSR.**

566 (A and B) Western blot analysis for YAP in isolated ISC treated with 5 mg/ml CHX for 0-4 h (A) or

567 pretreated with 10 mM MG132 for 2 h and then treated with 5 mg/ml CHX for 0-4 h (B). And line graph

568 showing the relative YAP protein levels quantified by YAP/β-actin ratio, which was arbitrarily set to 100%

569 at the 0 hour point. (C) Western blot and quantification analysis for YAP, p-YAP (Ser381), LGR5 in

570 isolated ISC from *Lsr<sup>ctrl</sup>* and *Lsr<sup>vill</sup> KO* mice (n=3). (D) YAP ubiquitination levels and quantification

571 analysis in isolated ISC from *Lsr<sup>ctrl</sup>* and *Lsr<sup>vill</sup> KO* mice. (E) Mass spectrometry analysis of LSR

572 immunocomplexes precipitated from isolated ISC. (F) Co-IP showing that endogenous YAP, LSR, and

573 14-3-3 zeta interacts with each other in isolated ISC from Lsr<sup>ctrl</sup> mice. (G) Co-IP showing that  
574 endogenous YAP interacts with endogenous LSR, but not PP2Ac in isolated ISC from Lsr<sup>ctrl</sup> mice. (H)  
575 Co-IP showing that endogenous YAP interacts with endogenous PP2Ac, but not 14-3-3 zeta in isolated  
576 ISC from Lsr<sup>vill<sup>KO</sup></sup> mice. (I) Western blot and quantification analysis of YAP and Ser381-phosphorylated  
577 YAP in HEK293 cells transfected YAP alone or together with PP2Ac (n=3). For all IP or Co-IP analysis,  
578 antibodies used for immunoprecipitation are shown above the lanes; antibody for blot visualization is  
579 shown on the right. \* $P < 0.05$ , \*\* $P < 0.01$ , \*\*\* $P < 0.001$ .  
580

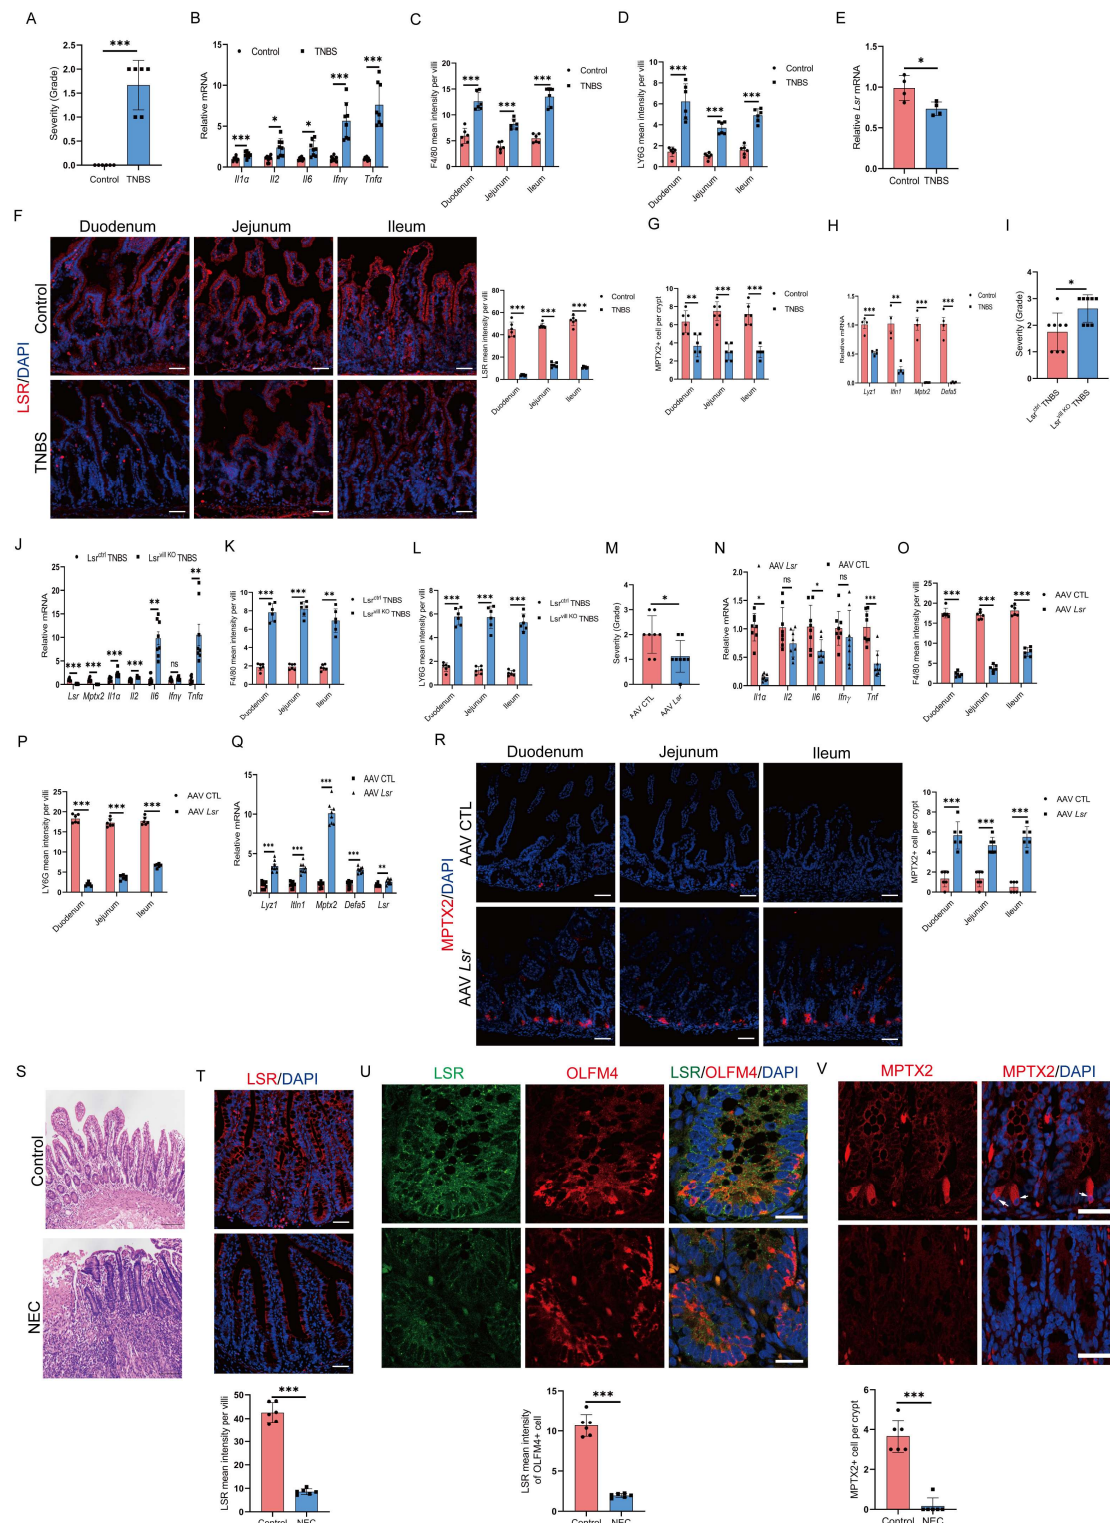

581

582 **Figure 6. Loss of *Lsr* exacerbates inflammation in a mouse model of NEC.**

583 (A) Severity of intestinal injury in control and TNBS-treated mice (n=8). (B) Expression of *Il1a*, *Il2*, *Il6*,

584 *Ifny* and *Tnfa* mRNA assessed by qRT-PCR in small intestines from control and TNBS-treated mice (n=8).

585 (C and D) Quantification analysis of F4/80 (C) and LY6G (D) mean intensity per villi in small intestines

586 from control and TNBS-treated mice (n=6). (E) Expression of *Lsr* mRNA assessed by qRT-PCR in small

587 intestines from control and TNBS-treated mice (n=4). (F) Immunofluorescence staining images and  
588 quantitative analysis of LSR in small intestines from control and TNBS-treated mice (n=6). (G)  
589 Quantification analysis of MPTX2<sup>+</sup> cell per crypt in small intestines from control and TNBS-treated mice  
590 (n=6). (H) mRNA expression of Paneth cell markers assessed by qRT-PCR in small intestines from  
591 control and TNBS-treated mice (n=4). (I) Severity of intestinal injury in TNBS-treated Lsr<sup>ctrl</sup> and Lsr<sup>vill</sup>  
592 <sup>KO</sup> mice (n=8). (J) mRNA expression of *Lsr*, *Mptx2*, *Il1a*, *Il2*, *Il6*, *Ifnγ* and *Tnfa* assessed by qRT-PCR in  
593 small intestines from TNBS-treated Lsr<sup>ctrl</sup> and Lsr<sup>vill</sup><sup>KO</sup> mice (n=8). (K and L) Quantification analysis of  
594 F4/80 (K) and LY6G (L) mean intensity per villi in small intestines from TNBS-treated Lsr<sup>ctrl</sup> and Lsr<sup>vill</sup>  
595 <sup>KO</sup> mice (n=6). (M) Severity of intestinal injury in TNBS-treated mice administered with AAV-CTL or  
596 AAV-Lsr (n=8). (N) Expression of *Il1a*, *Il2*, *Il6*, *Ifnγ* and *Tnfa* mRNA assessed by qRT-PCR in small  
597 intestines from TNBS-treated mice administered with AAV-CTL or AAV-Lsr (n=8). (O and P)  
598 Quantification analysis of F4/80 (O) and LY6G (P) mean intensity per villi in small intestines from  
599 TNBS-treated mice administered with AAV-CTL or AAV-Lsr (n=6). (Q) Expression of *Lyz1*, *Itln1*, *Mptx2*,  
600 *Defa5* and *Lsr* mRNA assessed by qRT-PCR in small intestines from TNBS-treated mice administered  
601 with AAV-CTL or AAV-Lsr (n=8). (R) Immunofluorescence staining images and quantitative analysis of  
602 MPTX2 in small intestines from TNBS-treated mice administered with AAV-CTL or AAV-Lsr (n=6). (S)  
603 Representative H&E-stained small intestinal biopsy specimens of subjects with NEC and a control. (T-  
604 V) Immunofluorescence staining images and quantitative analysis of LSR (T), LSR and OLFM4 (U),  
605 and MPTX2 (V) in small intestinal biopsy specimens of subjects with NEC and a control (arrows  
606 indicated Paneth cells) (n=6). Scale bars: F, R, T and V, 50 μm; S, 100 μm; U, 20 μm. \**P* < 0.05, \*\**P* <  
607 0.01, \*\*\**P* < 0.001.
